# Supplementary material
Source: MDPI journal article supplement (https://www.mdpi.com/2073-4395/13/5/1361)
Supplement: s1 [file s1]

**Table S1.** Relationship between indicators and quality score in the rape planting system.

| Quality score | Indicators (Weight)         |                                                   |                                      |                  |                                             |                   |
|---------------|-----------------------------|---------------------------------------------------|--------------------------------------|------------------|---------------------------------------------|-------------------|
|               | Surface soil texture (0.15) | Soil organic content (0.25)<br>g kg <sup>-1</sup> | Tillage layer thickness (0.20)<br>cm | pH (0.15)        | Effective soil layer thickness (0.15)<br>cm | Slope (0.10)<br>° |
| 100           | loam                        | ≥30                                               | ≥20                                  | 6.5–7.5          | ≥100                                        | 0–2               |
| 95            |                             | 25–30                                             |                                      |                  |                                             |                   |
| 90            | silt loam /clay loam        | 20–25                                             | 18–20                                |                  | 80–100                                      | 2–6               |
| 80            |                             | 15–20                                             | 15–18                                | 5.5–6.5          |                                             |                   |
| 75            | loamy clay /sandy loam      |                                                   |                                      |                  |                                             |                   |
| 70            |                             | 10–15                                             |                                      |                  | 60–80                                       |                   |
| 65            |                             |                                                   | 10–15                                |                  |                                             |                   |
| 60            |                             |                                                   |                                      |                  |                                             | 6–15              |
| 50            | sand                        | 5–10                                              |                                      |                  |                                             |                   |
| 45            | clay                        |                                                   |                                      |                  |                                             |                   |
| 40            |                             |                                                   |                                      | 4.5–5.5 /7.5–8.5 | 30–60                                       |                   |
| 35            |                             |                                                   | < 10                                 |                  |                                             |                   |
| 30            |                             |                                                   |                                      | > 8.5            |                                             | 15–25             |
| 20            |                             | < 5                                               |                                      | < 4.5            | < 30                                        |                   |

**Table S2.** Relationship between indicators and quality score in the rice planting system.

| Quality score | Indicators (Weight)              |                             |                                                   |                                      |                                        |                      |
|---------------|----------------------------------|-----------------------------|---------------------------------------------------|--------------------------------------|----------------------------------------|----------------------|
|               | Soil basic fertility (0.25)<br>% | Surface soil texture (0.10) | Soil organic content (0.20)<br>g kg <sup>-1</sup> | Tillage layer thickness (0.10)<br>cm | Irrigation guaranteed rate (0.20)<br>% | Altitude (0.15)<br>m |
| 100           | ≥80                              | loam                        | ≥30                                               | ≥20                                  | ≥70                                    | ≤10                  |
| 95            |                                  |                             |                                                   | 18–20                                |                                        | 10–50                |
| 90            |                                  | silt loam /clay loam        | 25–30                                             | 15–18                                |                                        | 50–150               |
| 85            | 70–80                            |                             |                                                   |                                      | 50–70                                  |                      |
| 80            |                                  | loamy clay /sandy loam      | 20–25                                             |                                      |                                        | 150–300              |
| 70            | 60–70                            |                             | 15–20                                             | 10–15                                |                                        | 300–500              |
| 60            |                                  | clay                        | 10–15                                             |                                      | 30–50                                  |                      |
| 55            | 50–60                            |                             |                                                   |                                      |                                        |                      |
| 50            |                                  |                             |                                                   | < 10                                 |                                        | 500–800              |
| 40            |                                  | sand                        | 5–10                                              |                                      |                                        |                      |
| 35            | 40–50                            |                             |                                                   |                                      |                                        |                      |
| 30            |                                  |                             |                                                   |                                      | < 30                                   | 800–1000             |
| 20            |                                  |                             | < 5                                               |                                      |                                        |                      |
| 15            | < 40                             |                             |                                                   |                                      |                                        |                      |
| 10            |                                  |                             |                                                   |                                      |                                        | > 1000               |

**Table S3.** Relationship between grade and grade index.

| <b>Cultivated land grade</b> | <b>Cultivated land grade index</b> |
|------------------------------|------------------------------------|
| 1                            | 5600–6000                          |
| 2                            | 5200–5600                          |
| 3                            | 4800–5200                          |
| 4                            | 4400–4800                          |
| 5                            | 4000–4400                          |
| 6                            | 3600–4000                          |
| 7                            | 3200–3600                          |
| 8                            | 2800–3200                          |
| 9                            | 2400–2800                          |
| 10                           | 2000–2400                          |
| 11                           | 1600–2000                          |
| 12                           | 1200–1600                          |
| 13                           | 800–1200                           |
| 14                           | 400–800                            |
| 15                           | 0–400                              |

**Table S4.** Estimated communality and weight value of each soil quality in the total data set (TDS).

| <b>Soil indicator</b>           | <b>Communality</b> | <b>Weight</b> |
|---------------------------------|--------------------|---------------|
| Soil organic carbon             | 0.976              | 0.068         |
| Particulate organic carbon      | 0.974              | 0.068         |
| Particulate organic nitrogen    | 0.958              | 0.067         |
| Labile organic carbon           | 0.799              | 0.056         |
| Dissolved organic carbon        | 0.731              | 0.051         |
| Dissolved organic nitrogen      | 0.892              | 0.062         |
| Total nitrogen                  | 0.961              | 0.067         |
| Alkaline hydrolysis nitrogen    | 0.866              | 0.060         |
| NH <sub>4</sub> <sup>+</sup> -N | 0.818              | 0.057         |
| NO <sub>3</sub> <sup>-</sup> -N | 0.774              | 0.054         |
| Available phosphorus            | 0.902              | 0.063         |
| Available potassium             | 0.979              | 0.068         |
| Urease activity                 | 0.964              | 0.067         |
| Sucrase activity                | 0.974              | 0.068         |
| Neutral phosphatase activity    | 0.960              | 0.067         |
| Cellulase activity              | 0.867              | 0.060         |
